# Supplementary material for: The effect of dilution on induced free charge density gradients in room temperature ionic liquids
Source: Royal Society of Chemistry journal article supplement (doi:10.1039/d1cp05027c), 2022-01-01
Supplement: d1cp05027c1.pdf [file d1cp05027c1.pdf]

## Supporting Information

### The Effect of Dilution on Induced Free Charge Density Gradients in Room Temperature Ionic Liquids

Md. Iqbal Hossain and G. J. Blanchard\*  
Michigan State University  
Department of Chemistry  
East Lansing, MI 48824 USA

---

\* Author to whom correspondence should be addressed: email: [blanchard@chemistry.msu.edu](mailto:blanchard@chemistry.msu.edu) Tel: +1 517 353 1105.

Example of experimental data for CV<sup>+</sup> in BMIM<sup>+</sup>BF<sub>4</sub><sup>-</sup> (X=0.603) in ACN (X=0.397). Top panel show raw experimental I<sub>||</sub>(t) and I<sub>⊥</sub>(t) data. Bottom panel shows R(t) calculated using Eq. S1 and the fit of the function S2 to the experimental data.

$$R(t) = \frac{I_{\parallel}(t) - I_{\perp}(t)}{I_{\parallel}(t) + 2I_{\perp}(t)} \quad [\text{S1}]$$

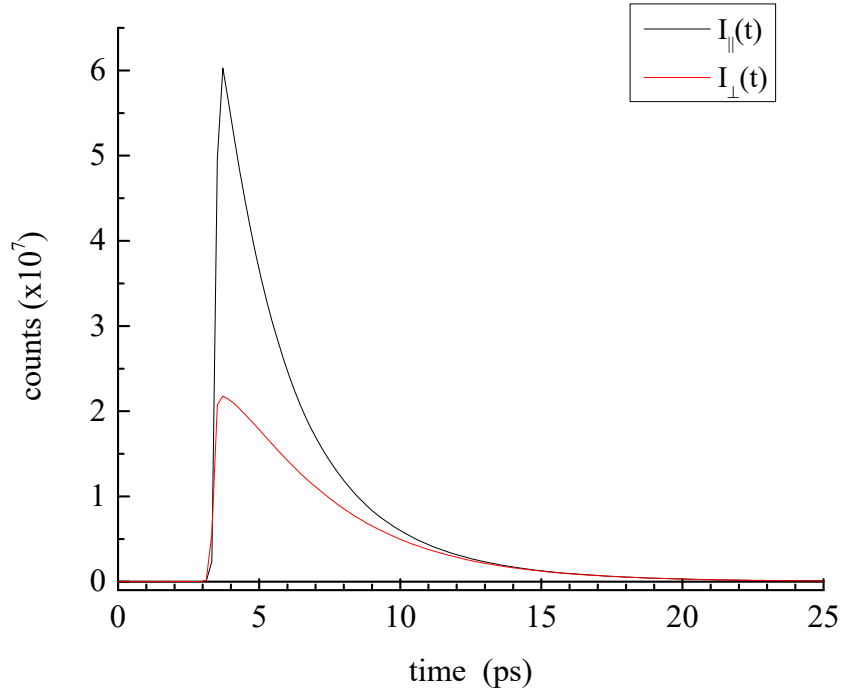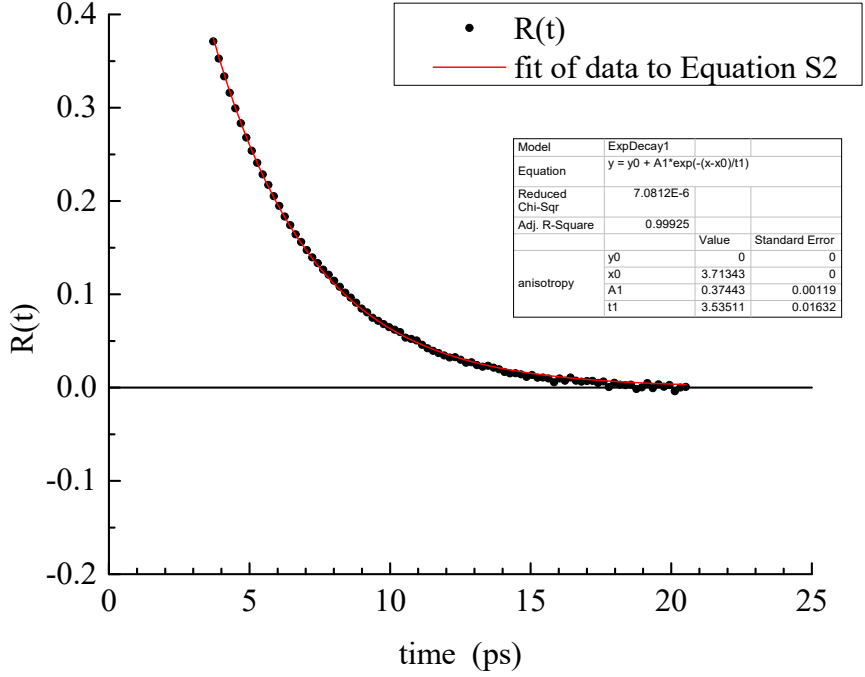

$$R(t) = R(0) \exp(-t/\tau_{OR})$$

[S2]

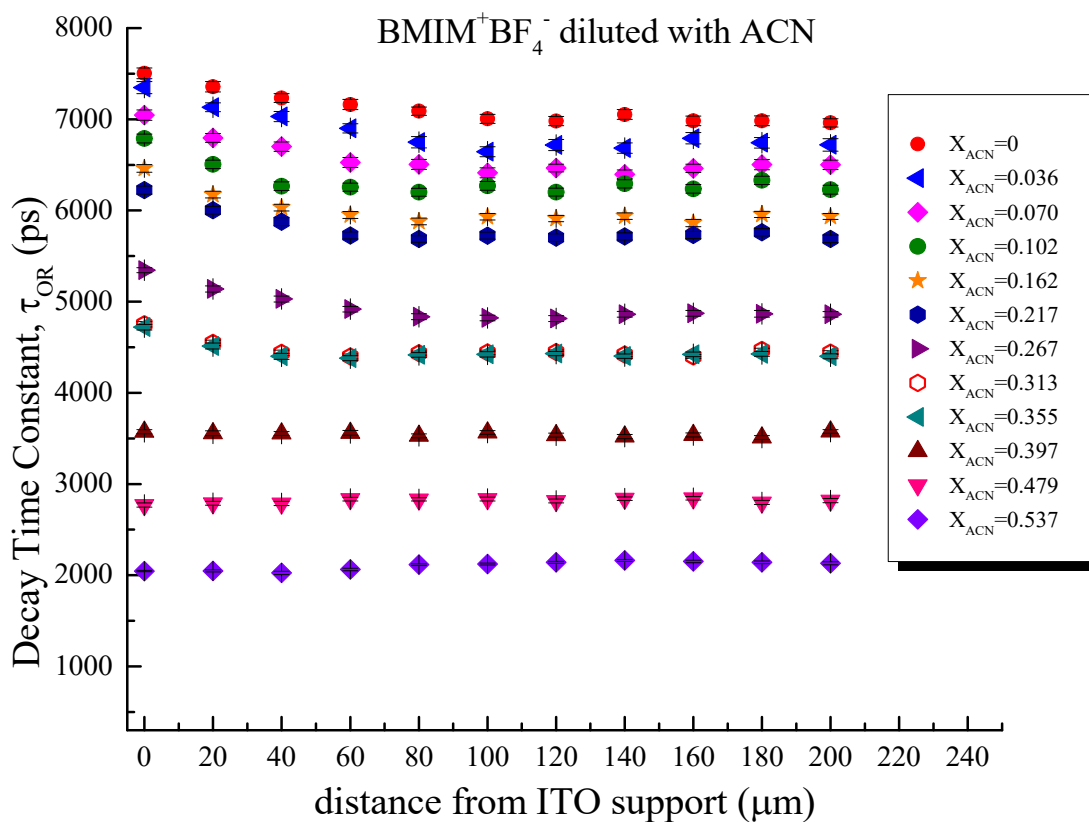

Figure S1. Anisotropy decay time constants of CV<sup>+</sup> in BMIM<sup>+</sup>BF<sub>4</sub><sup>-</sup> as a function of distance from the ITO support and as a function of dilution with ACN as indicated in the legend. Each time constant is the result of the average of 65,536 (256 x 256 array) I<sub>||</sub>(t) and I<sub>⊥</sub>(t) time-resolved data sets. The resulting data are processed according to Eq. 1 and the resulting R(t) function is fitted to a single exponential decay function. The error bars are  $\pm 1\sigma$  uncertainties for fits of R(t) to a single exponential decay function. Replicate measurements were performed at least three times.

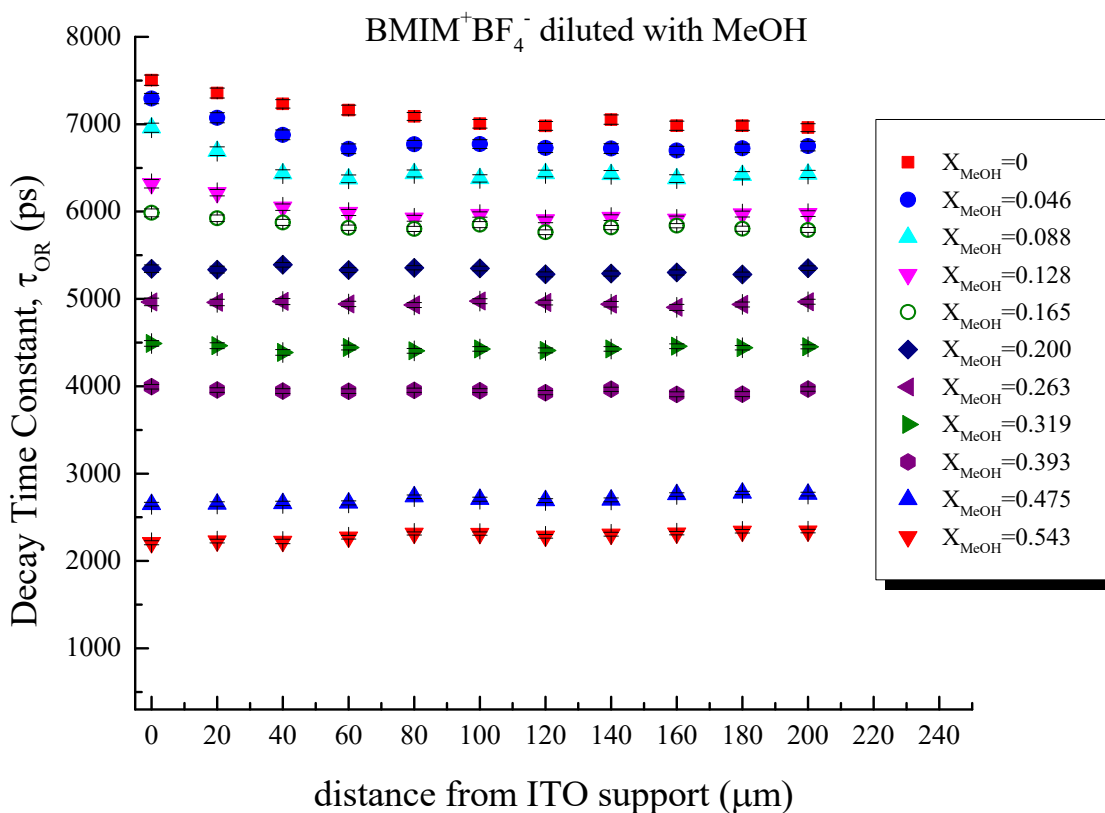

Figure S2. Anisotropy decay time constants of CV<sup>+</sup> in BMIM<sup>+</sup>BF<sub>4</sub><sup>-</sup> as a function of distance from the ITO support and as a function of dilution with MeOH as indicated in the legend. Each time constant is the result of the average of 65,536 (256 x 256 array) I<sub>||</sub>(t) and I<sub>⊥</sub>(t) time-resolved data sets. The resulting data are processed according to Eq. 1 and the resulting R(t) function is fitted to a single exponential decay function. The error bars are  $\pm 1\sigma$  uncertainties for fits of R(t) to a single exponential decay function. Replicate measurements were performed at least three times.

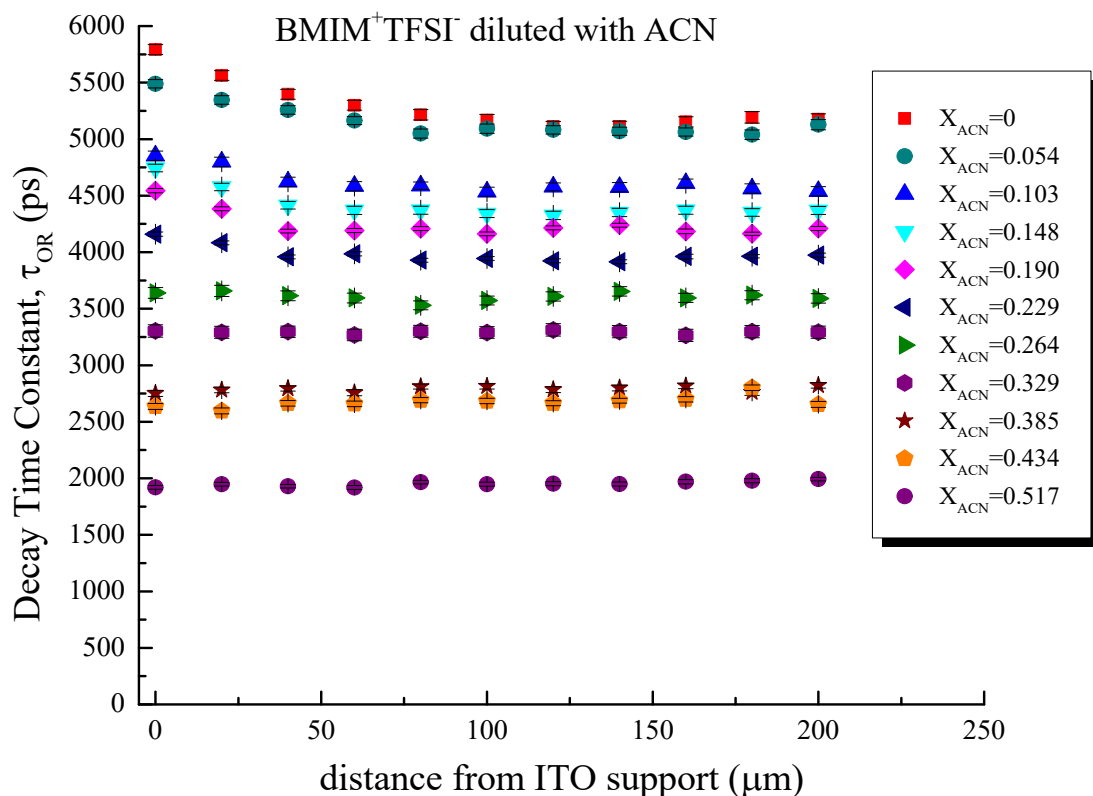

Figure S3. Anisotropy decay time constants of CV<sup>+</sup> in BMIM<sup>+</sup>TFSI<sup>-</sup> as a function of distance from the ITO support and as a function of dilution with ACN as indicated in the legend. Each time constant is the result of the average of 65,536 (256 x 256 array) I<sub>||</sub>(t) and I<sub>⊥</sub>(t) time-resolved data sets. The resulting data are processed according to Eq. 1 and the resulting R(t) function is fitted to a single exponential decay function. The error bars are  $\pm 1\sigma$  uncertainties for fits of R(t) to a single exponential decay function. Replicate measurements were performed at least three times.

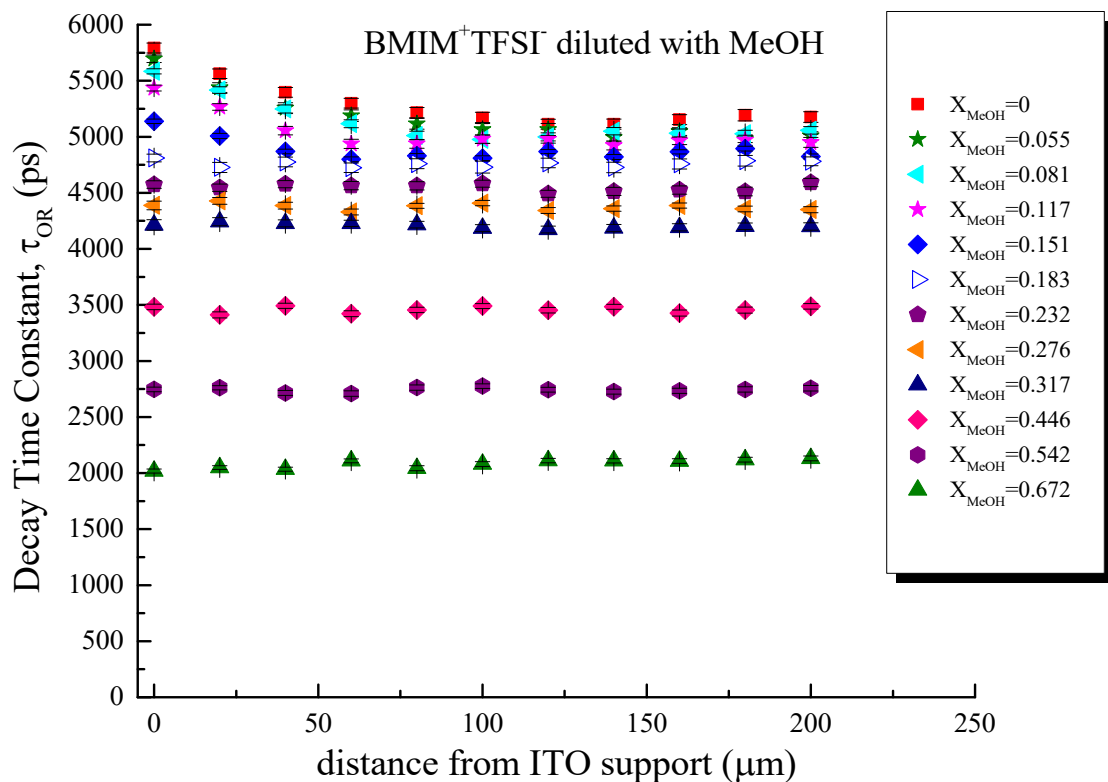

Figure S4. Anisotropy decay time constants of CV<sup>+</sup> in BMIM<sup>+</sup>TFSI<sup>-</sup> as a function of distance from the ITO support and as a function of dilution with MeOH as indicated in the legend. Each time constant is the result of the average of 65,536 (256 x 256 array) I<sub>||</sub>(t) and I<sub>⊥</sub>(t) time-resolved data sets. The resulting data are processed according to Eq. 1 and the resulting R(t) function is fitted to a single exponential decay function. The error bars are ±1σ uncertainties for fits of R(t) to a single exponential decay function. Replicate measurements were performed at least three times.

HMIM<sup>+</sup>TFSI<sup>-</sup> diluted with ACN

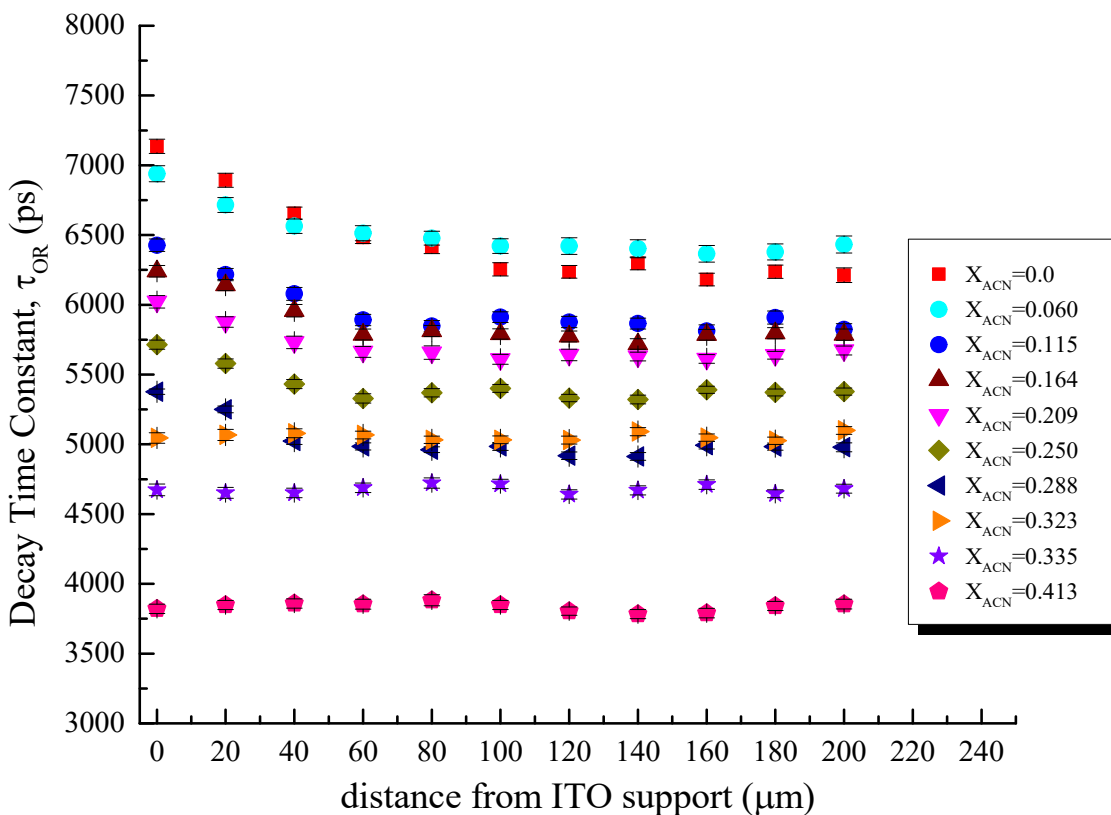

Figure S5. Anisotropy decay time constants of CV<sup>+</sup> in HMIM<sup>+</sup>TFSI<sup>-</sup> as a function of distance from the ITO support and as a function of dilution with ACN as indicated in the legend. Each time constant is the result of the average of 65,536 (256 x 256 array)  $I_{||}(t)$  and  $I_{\perp}(t)$  time-resolved data sets. The resulting data are processed according to Eq. 1 and the resulting  $R(t)$  function is fitted to a single exponential decay function. The error bars are  $\pm 1\sigma$  uncertainties for fits of  $R(t)$  to a single exponential decay function. Replicate measurements were performed at least three times.



HMIM<sup>+</sup>TFSI<sup>-</sup> diluted with MeOH

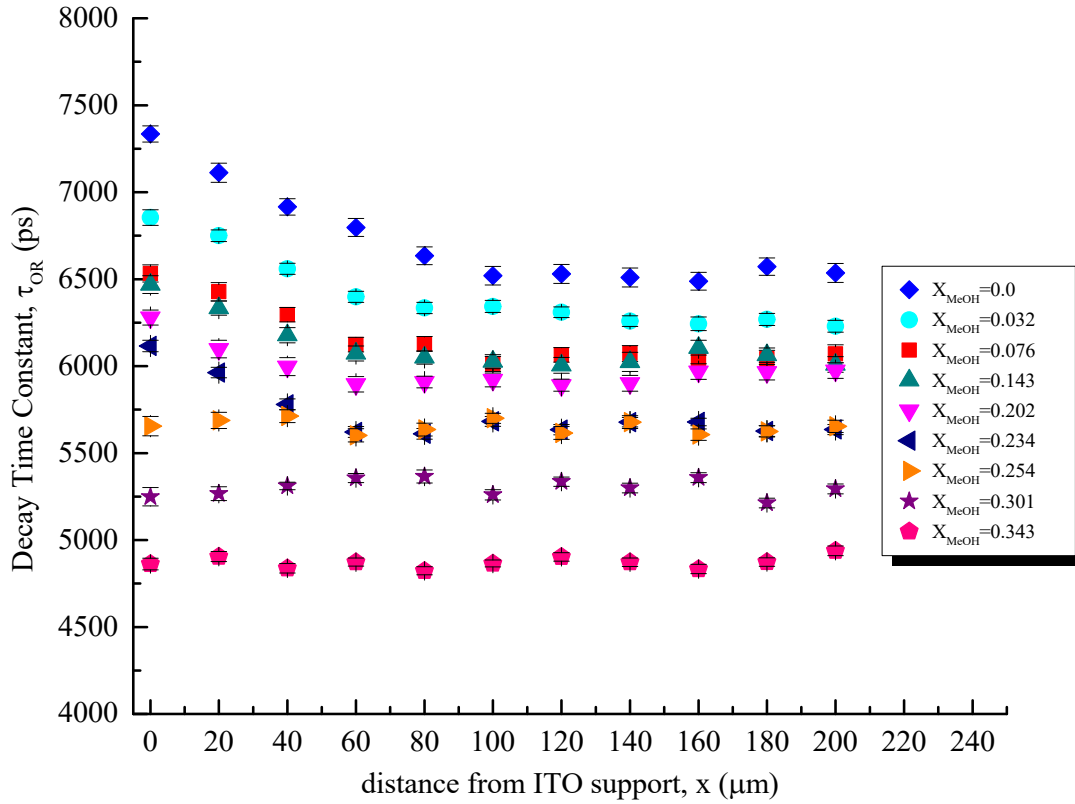

Figure S6. Anisotropy decay time constants of  $\text{CV}^+$  in  $\text{HMIM}^+\text{TFSI}^-$  as a function of distance from the ITO support and as a function of dilution with MeOH as indicated in the legend. Each time constant is the result of the average of 65,536 ( $256 \times 256$  array)  $I_{\parallel}(t)$  and  $I_{\perp}(t)$  time-resolved data sets. The resulting data are processed according to Eq. 1 and the resulting  $R(t)$  function is fitted to a single exponential decay function. The error bars are  $\pm 1\sigma$  uncertainties for fits of  $R(t)$  to a single exponential decay function. Replicate measurements were performed at least three times.
